# Supplementary material for: Chloroplast-localized GUN1 contributes to the acquisition of basal thermotolerance in Arabidopsis thaliana
Source: Frontiers journal article supplement (doi:10.3389/fpls.2022.1058831), 2022-12-22
Supplement: Data_Sheet_1.PDF [file Data_Sheet_1.PDF]

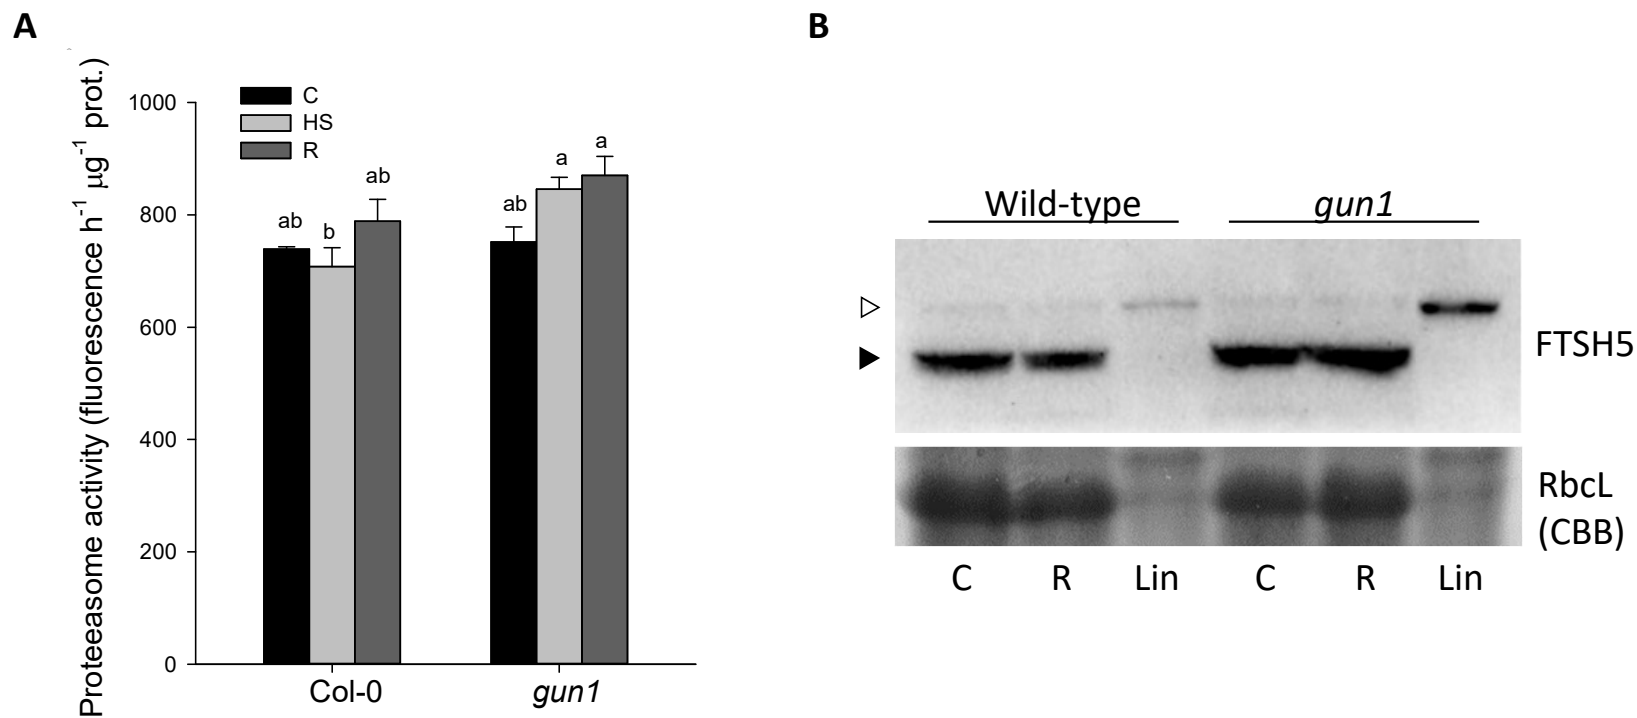

Figure S1 – Cytosolic folding stress evaluation in *gun1* mutant background. Measurements of proteasome activity (**A**). Immunoblot showing FTSH5 accumulation in wild-type and *gun1* genetic background grown in control condition (C), after 3 h recovery from heat shock (R) and in presence of 550 μM lincomycin (Lin) (**B**). Mature form and precursor bands are indicated by black or white arrowheads, respectively. The CBB-stained gel is shown as a loading control.
